# Supplementary material for: Simplifying the ShangRing technique for circumcision in boys and men: use of the no-flip technique with randomization to removal at 7 days versus spontaneous detachment
Source: PubMed Central journal article supplement — Asian J Androl. 2018 Nov 30;21(4):324–31. doi: 10.4103/aja.aja_91_18 (PMC6628734; doi:10.4103/aja.aja_91_18), 2018-11-30

### **The original flip and modified no-flip ShangRing techniques.**

The main difference between the techniques is the placement of the inner ring. With the original ShangRing circumcision technique (referred to as the flip technique), the inner ring is placed over the head of the penis at the level of the coronal sulcus (A) and then the foreskin is everted (turned back or flipped) over the inner ring (B). The outer ring is placed over the inner ring, with the foreskin between (C). A modification, known as the no-flip technique, simplifies the procedure by eliminating the need to evert the foreskin. With the no-flip technique, the inner ring is inserted under the foreskin (D) and then the outer ring is placed over the inner ring (E). It is not necessary to flip the foreskin over the inner ring. Additionally, the no-flip technique eliminates the need to make 8–10 small slits (cuts) in the tissue that remains after the foreskin has been excised, further reducing operative time. Removal of the ShangRing is also simplified. With the flip technique the inner ring is proximal to the wound (i.e., between the glans of the penis and the body), and it is necessary to cut off the inner ring (F) as the ring cannot be safely slipped over the wound and off the penis. With the flip technique, the inner ring is distal to the wound and thus the inner ring can be slipped off the penis during device removal without potential damage to the wound (G).

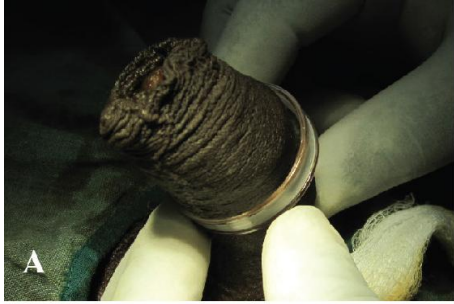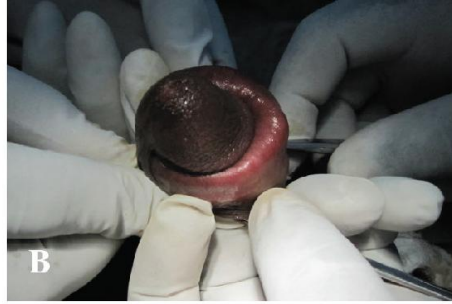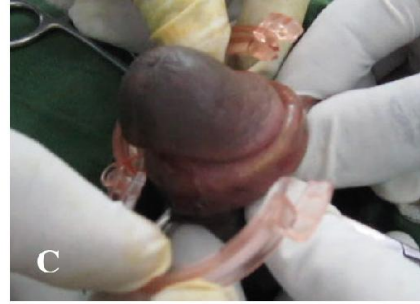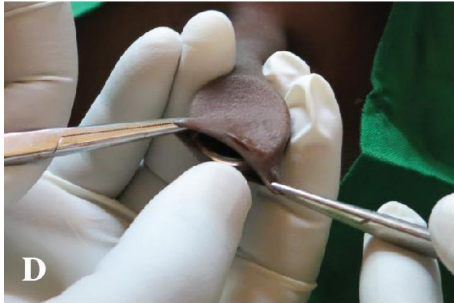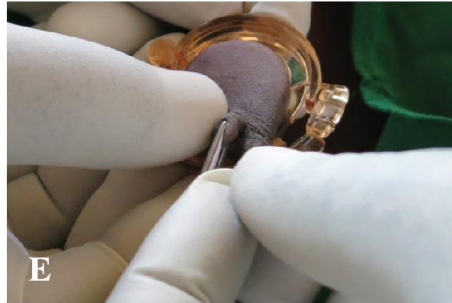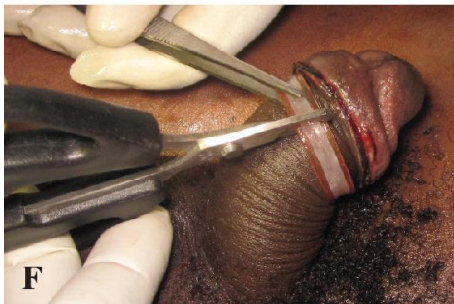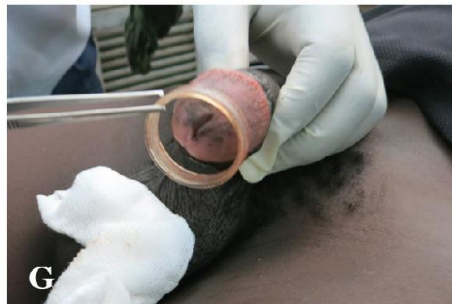

Supplement: AJA-21-324_Suppl1.pdf [file AJA-21-324_Suppl1.pdf]
