# Supplementary material for: Simplifying the ShangRing technique for circumcision in boys and men: use of the no-flip technique with randomization to removal at 7 days versus spontaneous detachment
Source: PubMed Central journal article supplement — Asian J Androl. 2018 Nov 30;21(4):324–31. doi: 10.4103/aja.aja_91_18 (PMC6628734; doi:10.4103/aja.aja_91_18), 2018-11-30

## **The healing process after ShangRing circumcision**

Wound healing after ShangRing circumcision differs fundamentally from that seen after conventional suture-based surgical circumcision techniques. Healing after ShangRing circumcision is by secondary intention, which leads to a different appearance of the healing wound compared to conventional circumcision techniques.

During the time that the ShangRing is in place, a circumferential scab forms along the wound surface (A and B). When the ShangRing is removed, the scab and pink granulation tissue are commonly seen around the penis (A-E). The healthy pink granulation tissue may even have a yellow covering resulting from fibrin exudate (E). Although this may seem abnormal to those familiar with only suture-based circumcision techniques, it is part of the normal wound healing process after ShangRing circumcision and should not be confused with wound dehiscence or infection. Granulation tissue forms in the space between the wound edges, followed by contraction of the wound edges; subsequently, skin grows over the wound, a process known as epithelialization (F-M). There is frequently variability in the degree of healing on an individual person's penis (F-H) and different people experience varying rates of healing, with some healing faster than others (I-L)

Spontaneous detachment of the ShangRing (i.e., allowing the ring to fall off on its own as opposed to having a provider removal the ring) may occur at different durations following circumcision (N-O). Given this fact, the wound may look different or the healing may be at a different stage than the examples shown here. Nevertheless, after the ShangRing falls off, healing should proceed along the lines seen in the illustrations.

## ShangRing™ circumcision, Day 7

Ring on

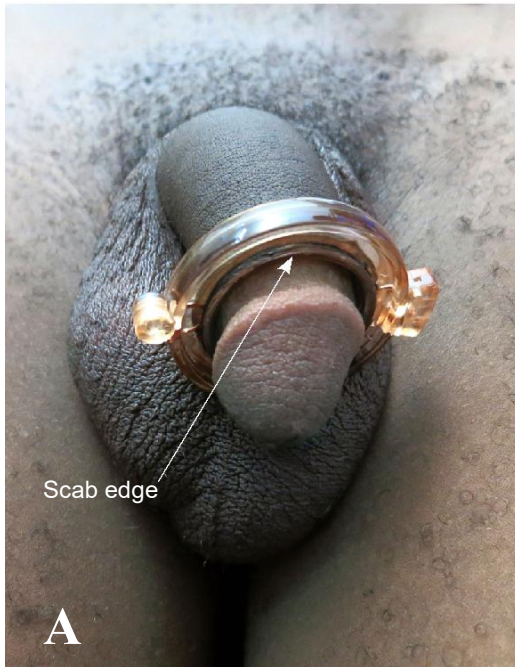

After ring removal

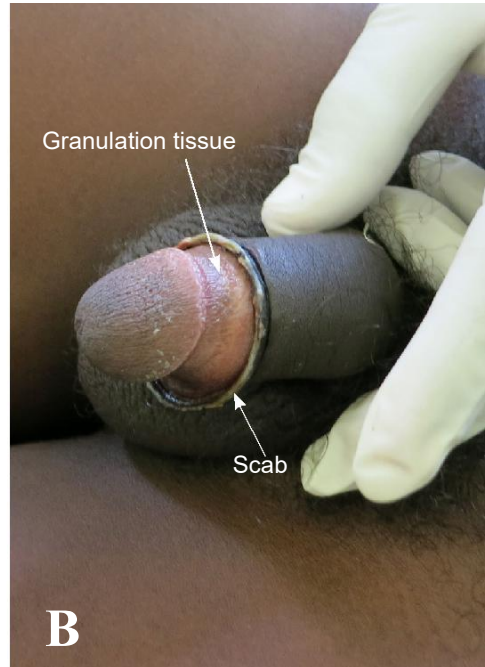

## ShangRing™ circumcision, Day 9

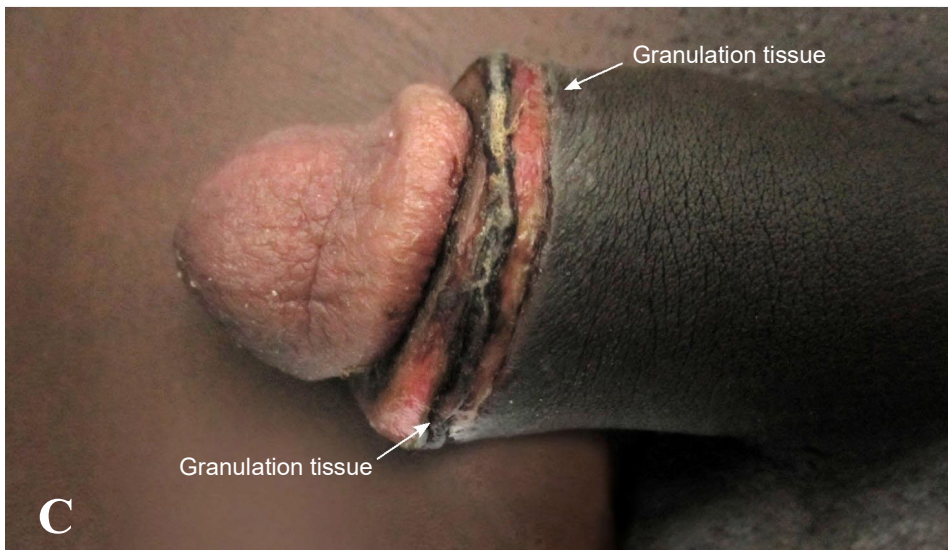

## ShangRing™ circumcision, Day 14

Scab detachment

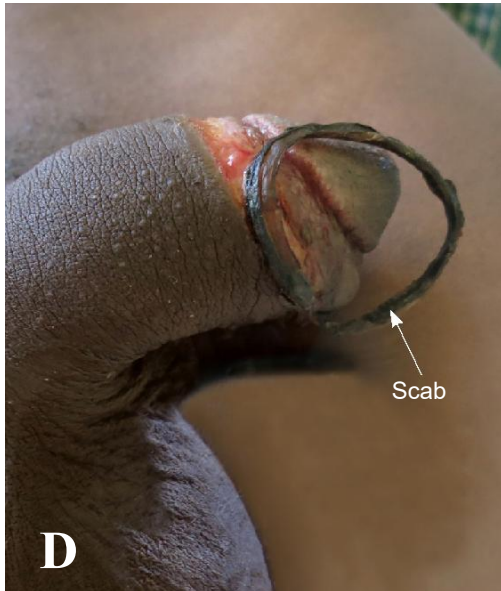

Healthy granulation tissue

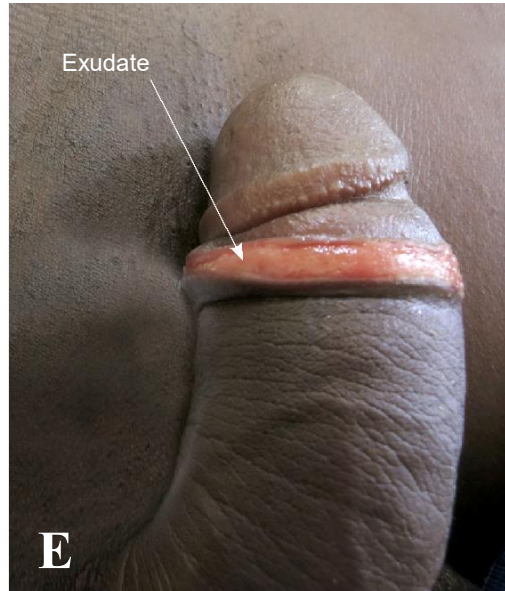

Note: In the photo at right, yellow fibrin exudate should not be confused with infection.

## Uneven healing of ShangRing™ circumcision, Day 21

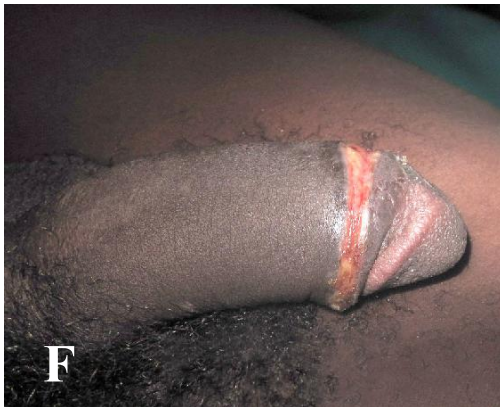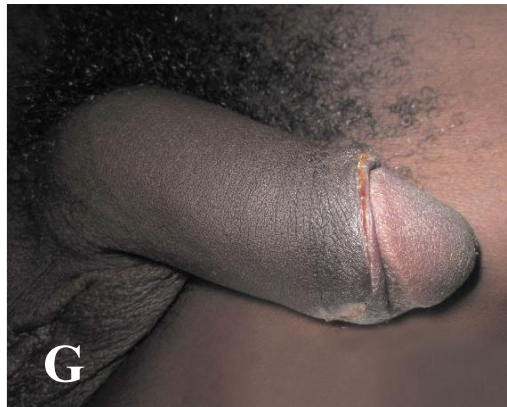

Top: Healing is more advanced on one side (right) than on the other (left).

Right: Often, healing is slowest on the underside, at the frenulum.

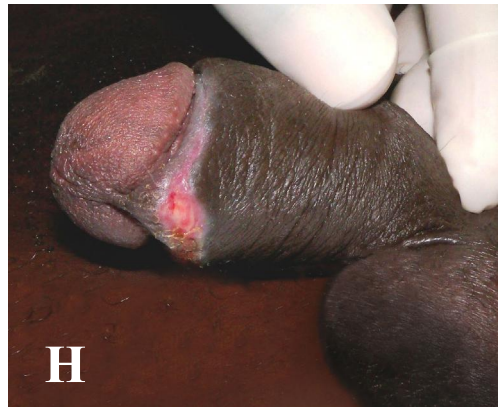

## ShangRing™ circumcision, Days 28 (top) and 35 (bottom)

Day 28

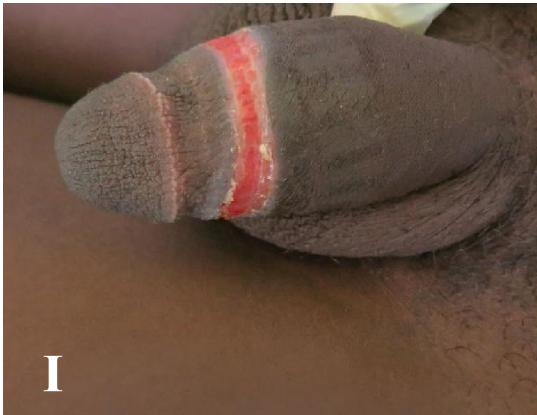

Day 28

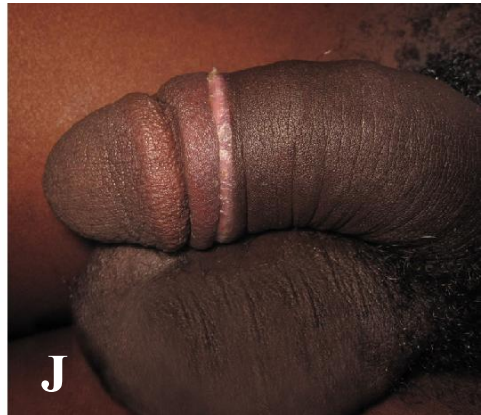

Day 35

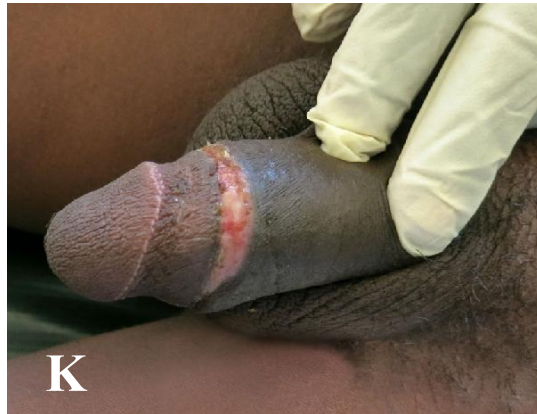

Day 35

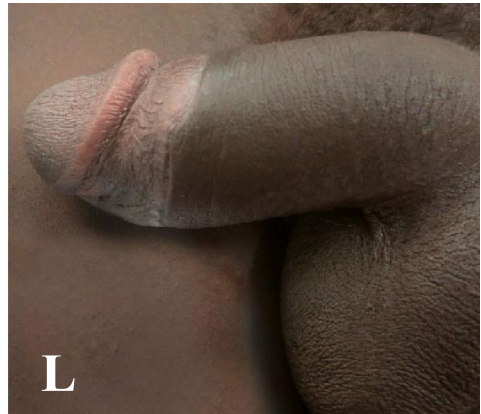

Note: Different people experience varying rates of healing: Here, the photos on the left show less-advanced healing than those on the right at Day 28 and at Day 35 following circumcision.

**ShangRing™ circumcision, healed**

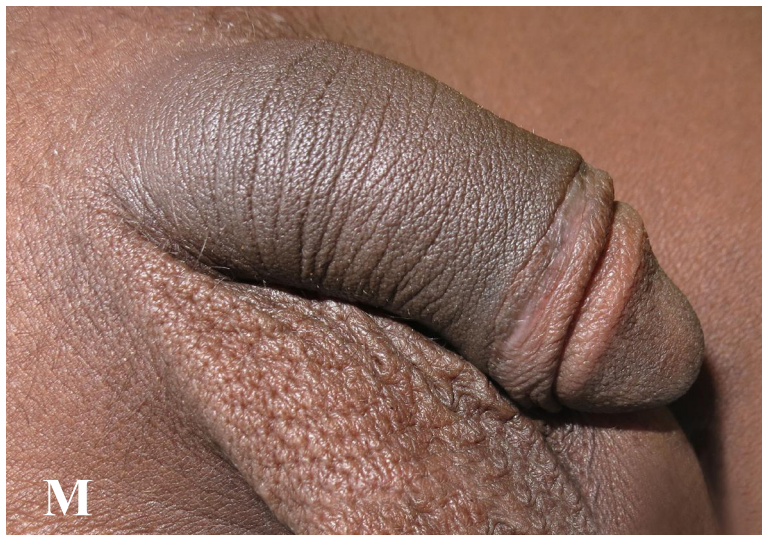

**Examples of spontaneous detachment of the ShangRing™**

Earlier detachment (11 days postcircumcision)    Later detachment (21 days postcircumcision)

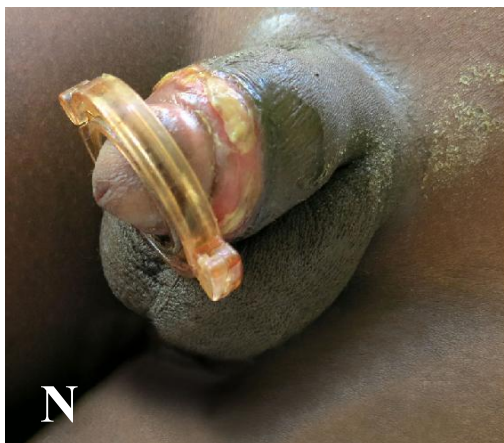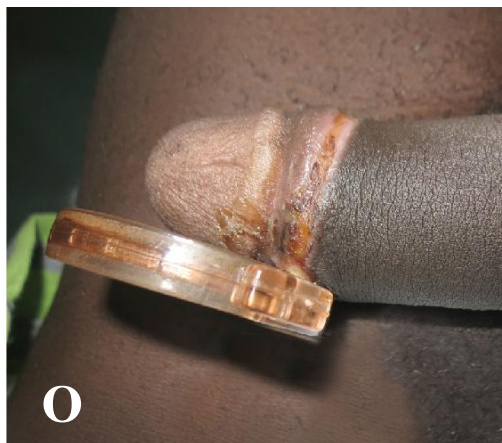

Supplement: AJA-21-324_Suppl2.pdf [file AJA-21-324_Suppl2.pdf]
